# Supplementary material
Source: HighWire-hosted journal article supplement (https://jpet.aspetjournals.org/highwire/filestream/149602/field_highwire_adjunct_files/0/486SupplFigures.pdf)
Supplement: 486SupplFigures.pdf [file 486SupplFigures.pdf]

## SUPPLEMENTARY MATERIAL

### **A p97/valosin-containing protein inhibitor drug CB-5083 has a potent but reversible off-target effect on phosphodiesterase-6**

Henri Leinonen\*, Cheng Cheng, Marja Pitkänen, Christopher L. Sander, Jianye Zhang, Sama Saeid, Teemu Turunen, Alyaa Shmara, Lan Weiss, Lac Ta, Timothy Ton, Ari Koskelainen, Jesse D. Vargas, Virginia Kimonis\*, Krzysztof Palczewski\*.

H.L., C.L.S., J.Z., K.P.: Gavin Herbert Eye Institute, Dept. of Ophthalmology, UC Irvine, Irvine, CA, USA.

K.P.: Dept. of Physiology & Biophysics, UC Irvine, Irvine, CA, USA.

K.P.: Dept. of Chemistry, UC Irvine, Irvine, CA, USA.

C.C., A.S., L.W., L.T., T.T., V.K.: Div. of Genetics and Genomic Medicine, Dept. of Pediatrics, UC Irvine, Irvine, CA, USA.

M.P., S.S., T.T., A.K.: Dept. of Neuroscience and Biomedical Engineering, Aalto University, Espoo, Finland.

J.D.V.: Cleave Therapeutics, Inc., San Francisco, CA, USA. (formerly Cleave Biosciences Inc.)

Running title: Off-target deactivation of PDE6 by VCP inhibitor CB-5083

\*Correspondence:

Krzysztof Palczewski Ph.D., Gavin Herbert Eye Institute, Department of Ophthalmology, Gillespie Neuroscience Research Facility, room 2216, 837 Health Sciences Rd, Irvine, CA, 92617. Email: kpalczew@uci.edu, phone: (949)824-6527

Henri Leinonen, Ph.D., Gavin Herbert Eye Institute, Department of Ophthalmology, Gillespie Neuroscience Research Facility, room 2216, 837 Health Sciences Rd, Irvine, CA, 92617. Email: hleinone@uci.edu, phone: (216)502-5428.

Virginia Kimonis, MD. MRCP, Professor, Dept. of Pediatrics, Division of Genetics and Genomic Medicine, Univ. of California-Irvine Med. Center, Hewitt Hall, Rm 2038, 843 Health Sciences Rd., Irvine CA 92697 Email: vkimonis@uci.edu phone: (949)824-0571

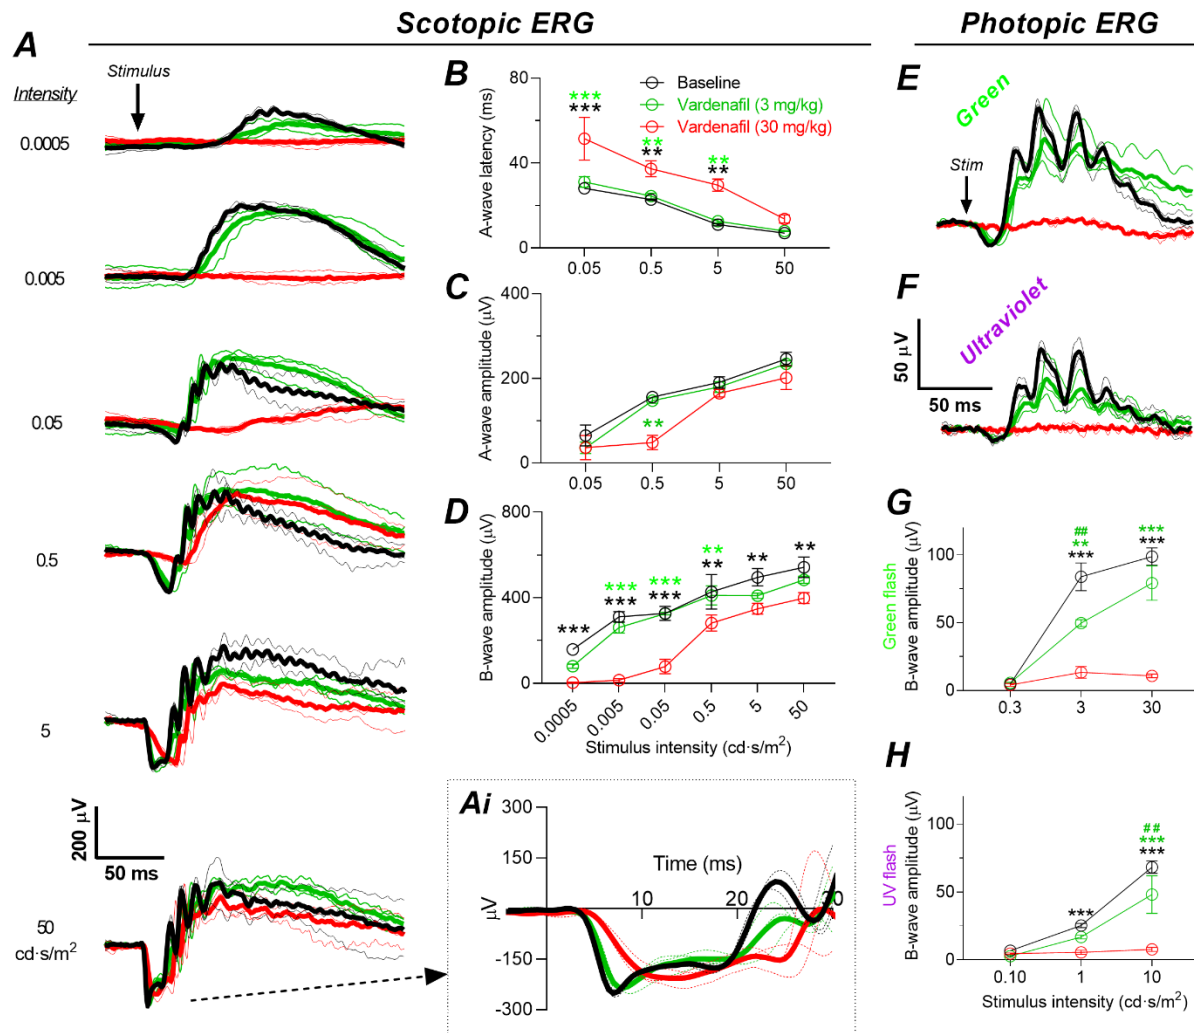

**Figure S1. Single systemic administration of vardenafil strongly suppresses retinal function in mice.** ERGs were first recorded in non-treated C57BL/6J mice (baseline,  $n=3$ , black), and then repeated in a separate session 45 min after intraperitoneal vardenafil. This two-step sequence was conducted for each dose of vardenafil (3 mg/kg and 30 mg/kg, green and red, respectively). The non-treatment and treatment sessions were separated by 1 week. (A) Rod-dominant scotopic ERG waveforms. Thin traces are individual mouse responses and thick lines are group averages. Inset Ai shows a magnified image of the A-wave leading edge at the highest stimulus strength. (B) A-wave latencies. (C) A-wave amplitudes. (D) B-wave amplitudes. (E-F) Photopic ERG waveforms in response to green (30  $\text{cd}\cdot\text{s}/\text{m}^2$ ) and UV (10  $\text{cd}\cdot\text{s}/\text{m}^2$ ) flashes. (G-H) Photopic ERG amplitudes. Statistical analysis: Repeated measures ANOVA followed by Bonferroni's post hoc tests. \* $P<0.05$ , \*\*/### $P<0.01$ , \*\*\* $P<0.001$ . Asterisks mark significant difference between baseline and 30 mg/kg vardenafil (black), or 3 mg/kg vardenafil and 30 mg/kg vardenafil (green). Pound signs mark difference between baseline and 3 mg/kg vardenafil. Data are presented as mean  $\pm$  SD.

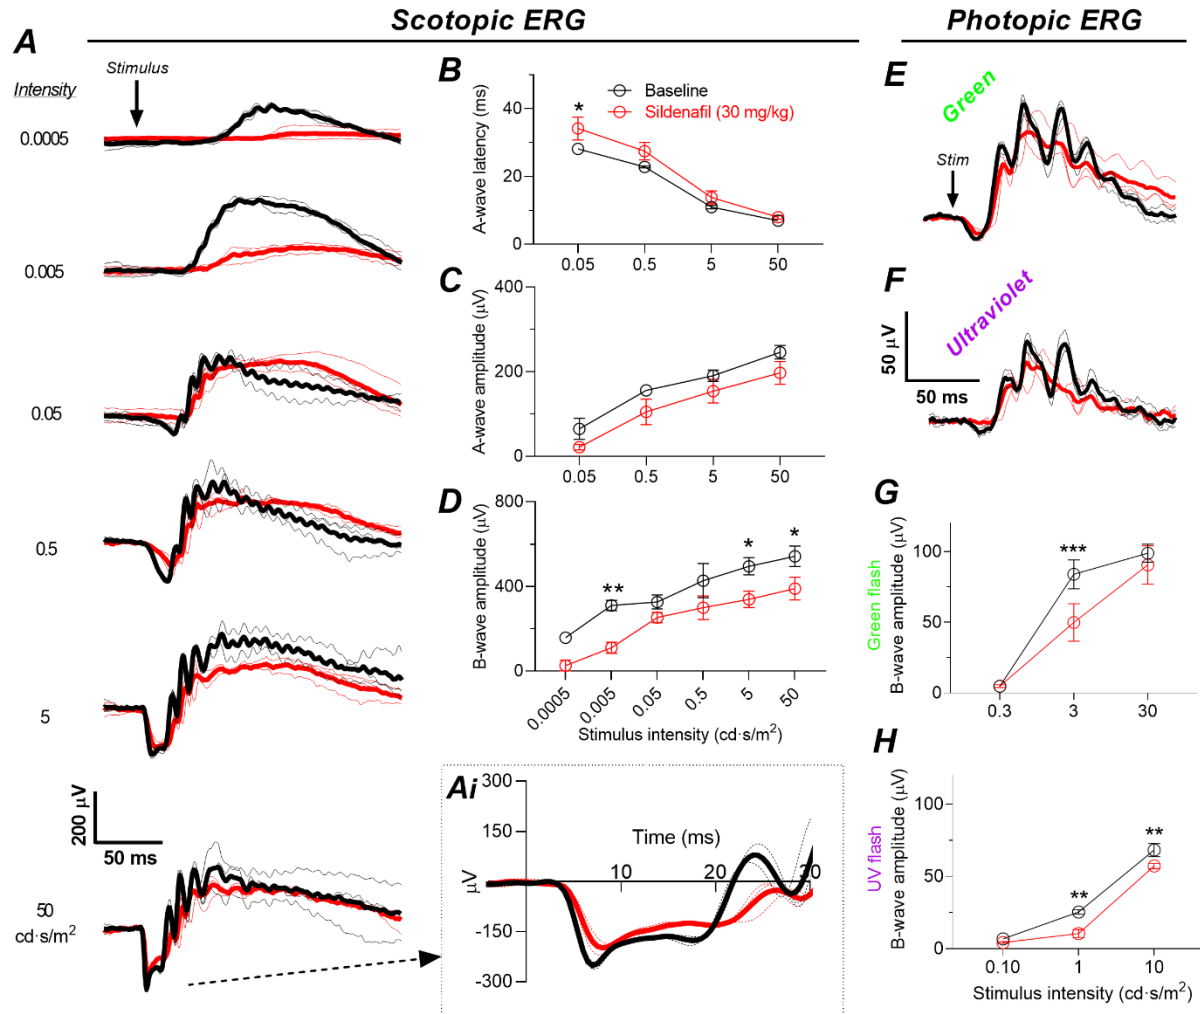

**Figure S2. Single administration of sildenafil moderately suppresses retinal function in mice.** ERGs were first recorded in non-treated C57BL/6J mice (baseline,  $n=3$ , black), and then repeated in a separate session 45 min after intraperitoneal sildenafil 30 mg/kg (red). The non-treatment and treatment sessions were separated by 1 week. (A) Rod-dominant scotopic ERG waveforms. Thin traces are individual mouse responses and thick lines are group averages. Inset Ai shows a magnified image of the A-wave leading edge at the highest stimulus strength. (B) A-wave latencies. (C) A-wave amplitudes. RM ANOVA between-subjects main effect:  $P<0.01$ . (D) B-wave amplitudes. (E-F) Photopic ERG waveforms in response to green (30  $\text{cd}\cdot\text{s}/\text{m}^2$ ) and UV (10  $\text{cd}\cdot\text{s}/\text{m}^2$ ) flashes. (G-H) Photopic ERG amplitudes. Statistical analysis: Repeated measures ANOVA followed by Bonferroni's post hoc tests. \* $P<0.05$ , \*\* $P<0.01$ . Data are presented as mean  $\pm$  SD.

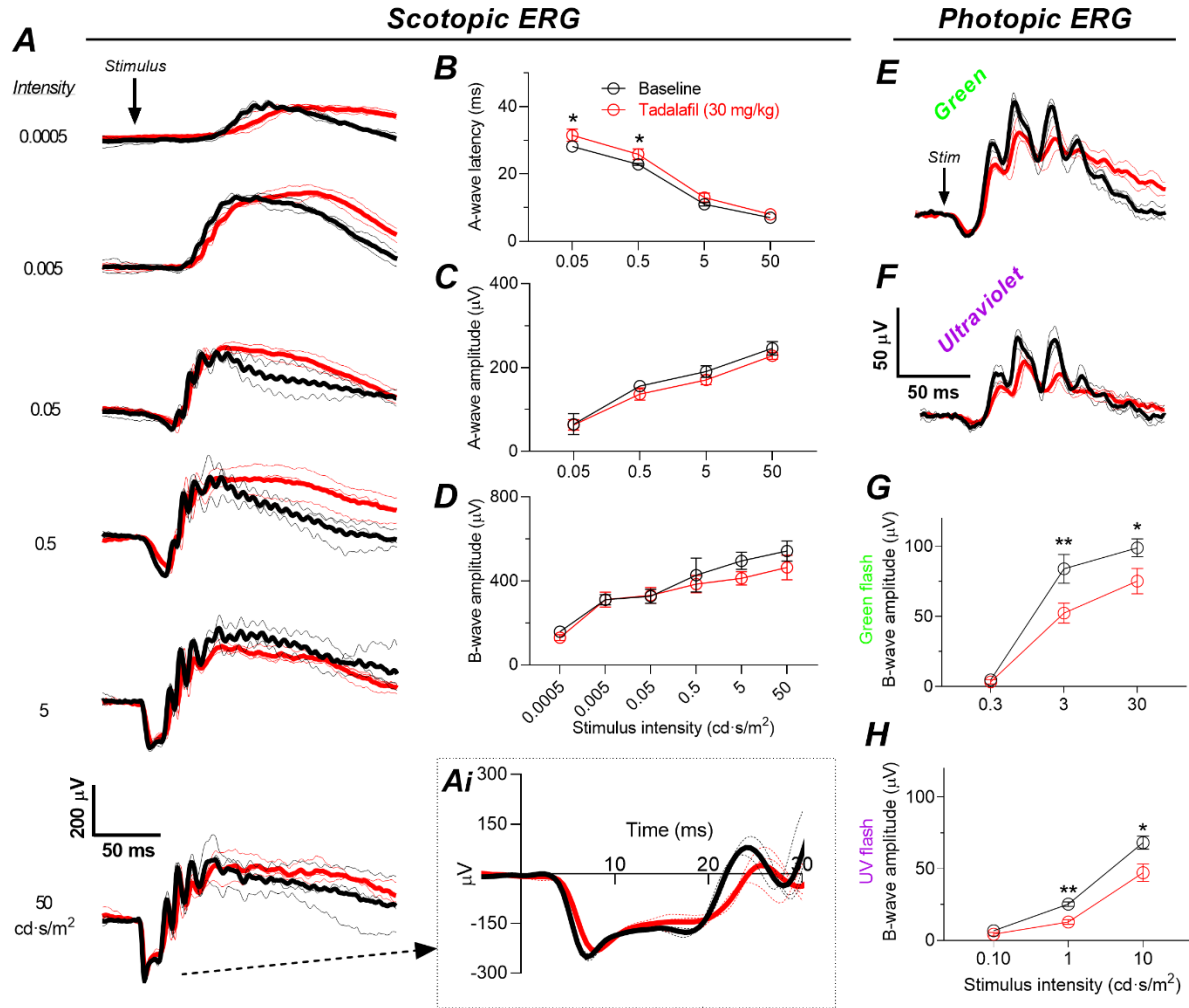

**Figure S3. Single administration of tadalafil shows a mild effect on rod-dominant ERG and an intermediate effect on cone-mediated ERG.** ERGs were first recorded in non-treated C57BL/6J mice (baseline,  $n=3$ , black), and then repeated in a separate session 45 min after intraperitoneal tadalafil 30 mg/kg (red). The non-treatment and treatment sessions were separated by 1 week. (A) Rod-dominant scotopic ERG waveforms. Thin traces are individual mouse responses and thick lines are group averages. Inset Ai shows a magnified image of the A-wave leading edge at the highest stimulus strength. (B) A-wave latencies. (C) A-wave amplitudes. RM ANOVA between-subjects main effect:  $P<0.05$ . (D) B-wave amplitudes. RM ANOVA between-subjects main effect:  $P<0.01$  (E-F) Photopic ERG waveforms in response to green ( $30 \text{ cd}\cdot\text{s}/\text{m}^2$ ) and UV ( $10 \text{ cd}\cdot\text{s}/\text{m}^2$ ) flashes. (G-H) Photopic ERG amplitudes. Statistical analysis: Repeated measures ANOVA followed by Bonferroni's post hoc tests. \* $P<0.05$ , \*\* $P<0.01$ . Data are presented as mean  $\pm$  SD.

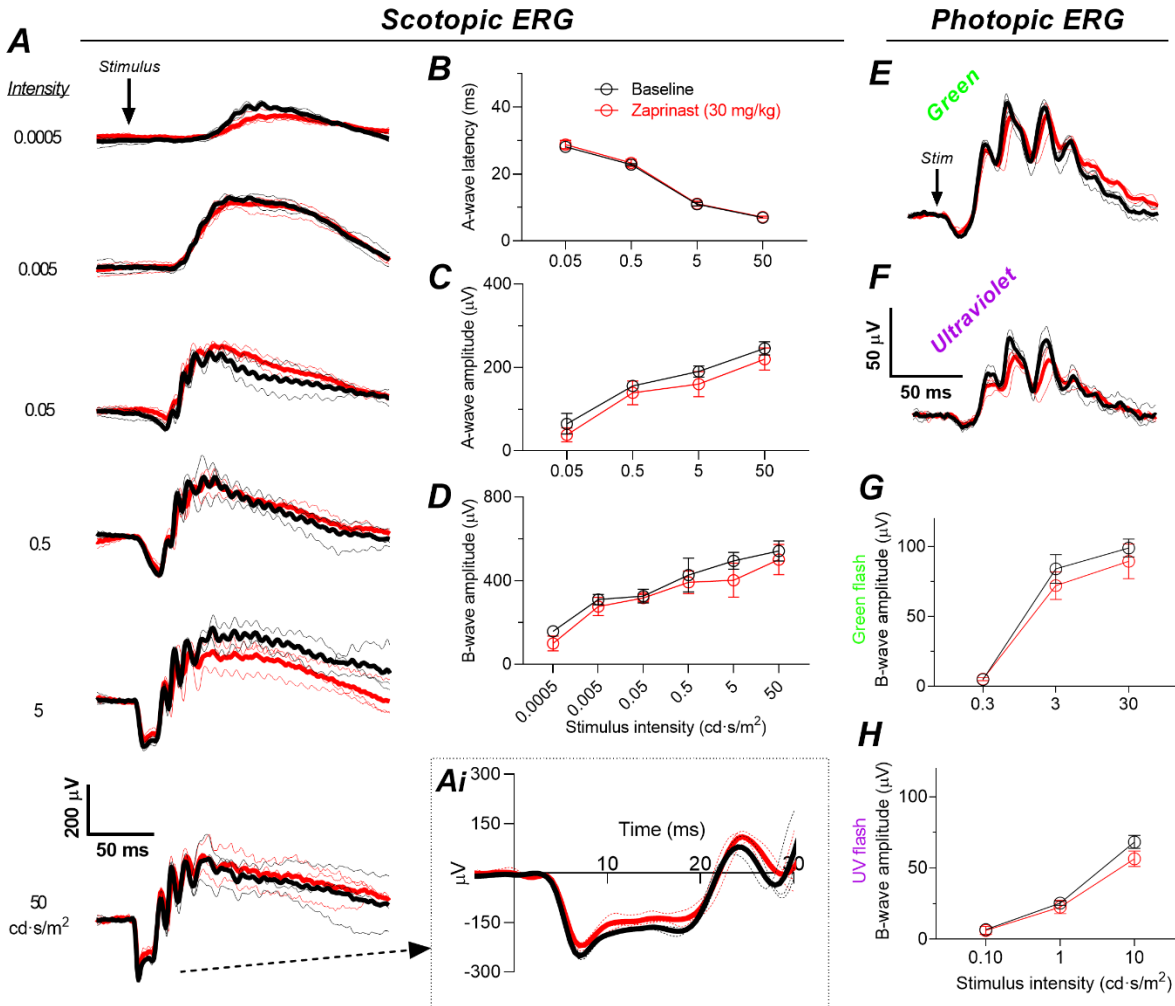

**Figure S4. Single administration of a PDE6-selective inhibitor Zaprinast has a negligible effect on retinal function in mice.** ERGs were first recorded in non-treated C57BL/6J mice (baseline,  $n=3$ , black), and then repeated in a separate session 45 min after intraperitoneal zaprinast 30 mg/kg (red). The non-treatment and treatment sessions were separated by 1 week. (A) Rod-dominant scotopic ERG waveforms. Thin traces are individual mouse responses and thick lines are group averages. Inset Ai shows a magnified image of the A-wave leading edge at the highest stimulus strength. (B) A-wave latencies. (C) A-wave amplitudes. (D) B-wave amplitudes. (E-F) Photopic ERG waveforms in response to green ( $30 \text{ cd}\cdot\text{s}/\text{m}^2$ ) and UV ( $10 \text{ cd}\cdot\text{s}/\text{m}^2$ ) flashes. (G-H) Photopic ERG amplitudes. Statistical analysis: Repeated measures ANOVA. No significant differences between groups were found although RM ANOVA between-subject effect trended towards significance in A- and B-wave amplitudes ( $P=0.07$  and  $P=0.05$ , respectively). Data are presented as mean  $\pm$  SD.

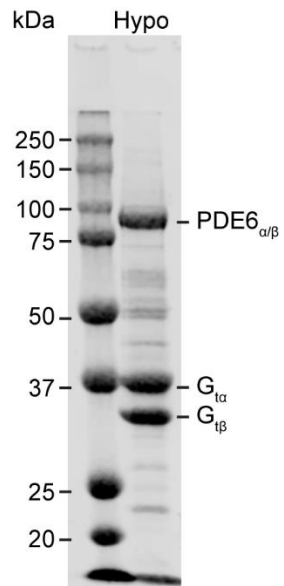

**Figure S5. Coomassie staining of the hypotonic bovine ROS fraction used in the PDE6-activity assay.** PDE6 is roughly one third of the protein in the hypotonic wash fraction of freshly prepared ROS, the other two thirds being the alpha and beta subunits of transducin (G<sub>tα</sub> and G<sub>tβ</sub>, respectively).

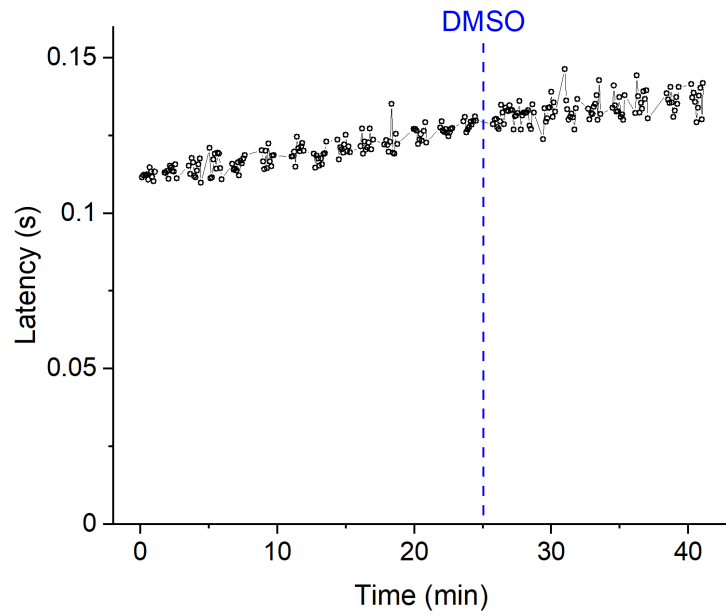

**Figure S6. DMSO at a concentration of 0.00026 % in *ex vivo* ERG perfusion solution does not affect the ERG signal.** The latency of the response to a dim flash stimulus in a photoreceptor *ex vivo* ERG was followed through a ~40 min experiment. DMSO (0.00026 v/v %) was added to the perfusion solution at the 25 min time point with no discernible effect on response kinetics.

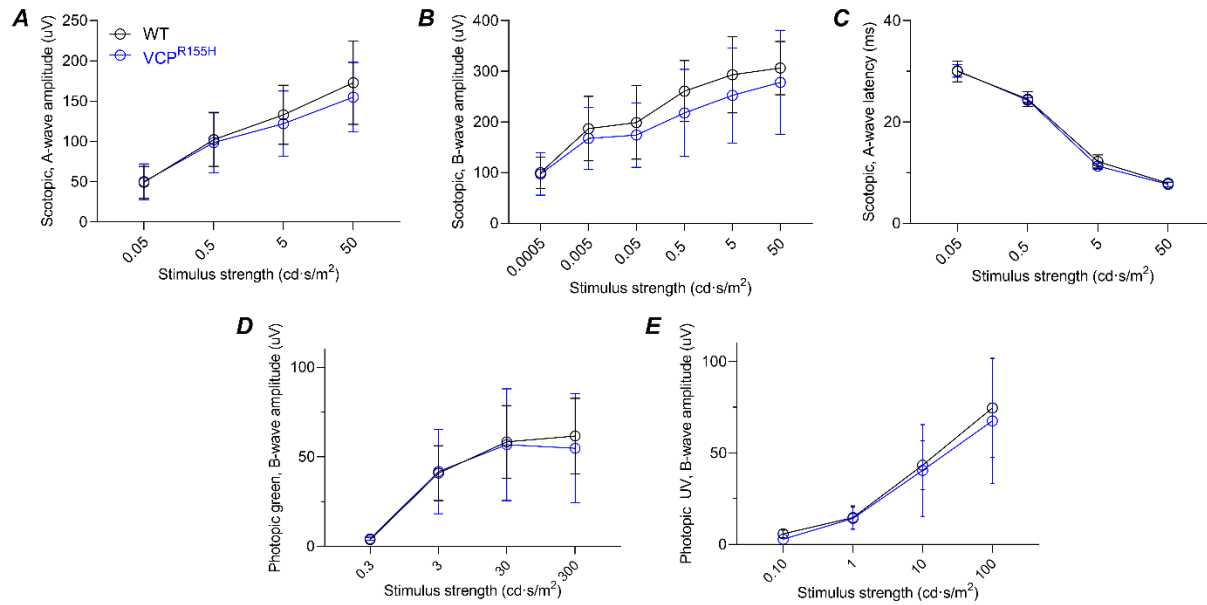

**Figure S7. Retinal function is not significantly altered in aged heterozygous *VCP*<sup>R155H</sup> knock-in mice.** ERG recording was performed in 24-month-old VCP mice (n=5) and 19-month-old C57BL/6J wild-type mice (n=7). (A). Scotopic A-wave amplitude. (B) Scotopic B-wave amplitude. (C) Scotopic A-wave latency. (D) Photopic B-wave amplitude for green stimuli. (E) Photopic B-wave amplitude for UV stimuli. Statistical analysis: Two-way ANOVA. No significant differences between groups were found. Data are presented as mean  $\pm$  SD.
